# Supplementary material for: Copper-free click chemistry with the short-lived positron emitter fluorine-18
Source: Royal Society of Chemistry journal article supplement (doi:10.1039/c1ob06034a), 2011-01-01

## Supplementary Information

### Copper-free click chemistry with the short-lived positron emitter fluorine-18

Vincent Bouvet, Melinda Wuest and Frank Wuest

*Department of Oncology, University of Alberta, 11560 University Ave, Edmonton  
AB T6G 1Z2, Canada.*

*Fax: +1 780 432 8483; Tel: +1 780 989 8150; E-mail: wuest@ualberta.ca*

#### **Contents**

**Spectra (NMR and MS) and HPLC traces of all compounds**

**Radio-HPLC traces of all <sup>18</sup>F-labeled compounds**

**<sup>1</sup>H-NMR - 5,6-Dihydro-11,12-didehydrodibenzo-[b,f]azocino-3-oxoprop-yl-4-fluorobenzamide (FB-DBCO).**

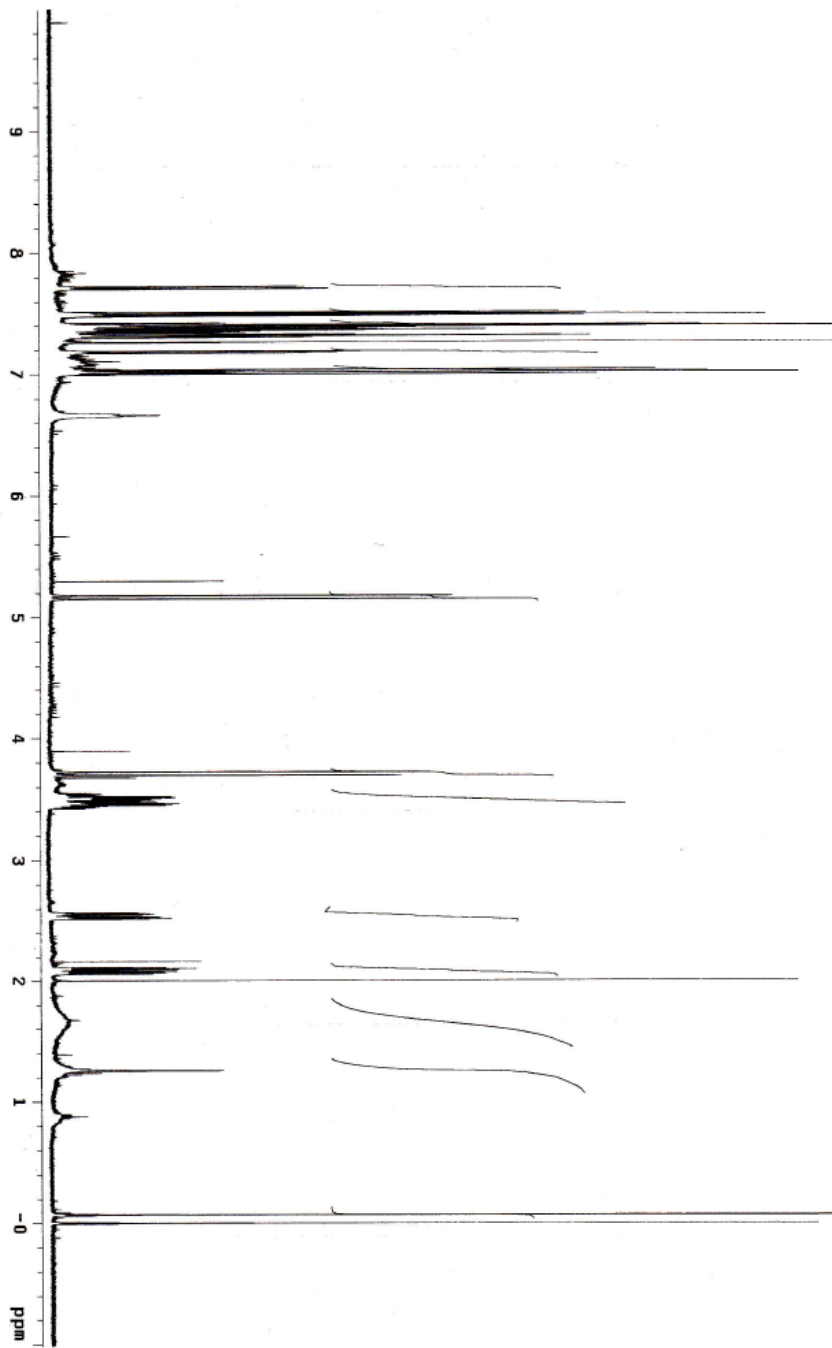

**$^{13}\text{C}$ -NMR - 5,6-Dihydro-11,12-didehydrodibenzo-[*b,f*]azocino-3-oxoprop-yl-4-fluorobenzamide (FB-DBC0).**

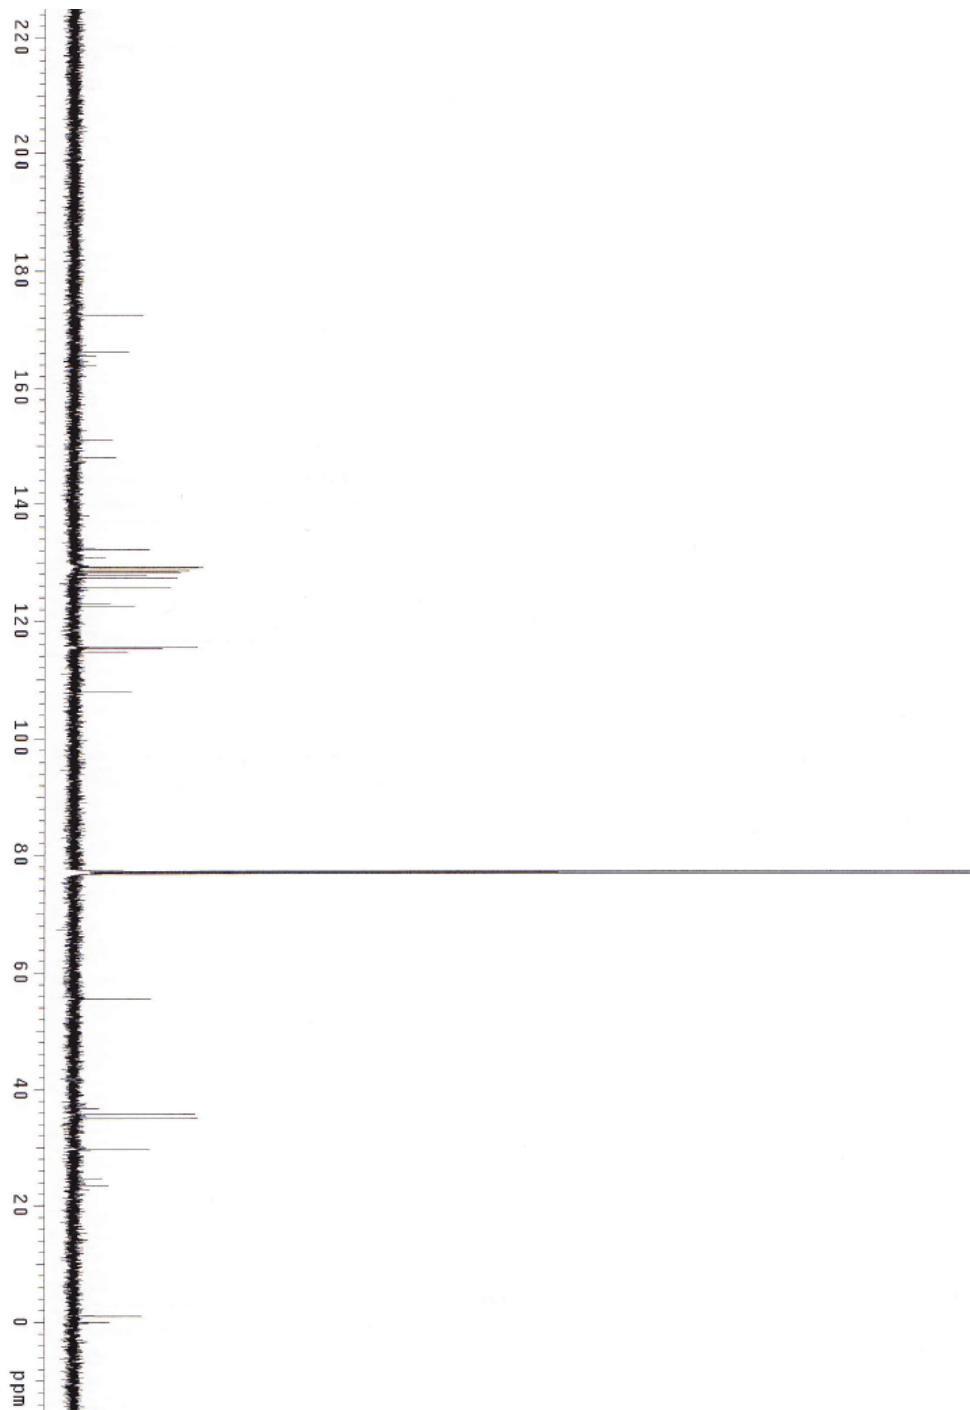

**MS - 5,6-Dihydro-11,12-didehydrodibenzo-[b,f]azocino-3-oxoprop-yl-4-fluorobenzamide (FB-DBCO).**

## Qualitative Compound Report

Comment V. Bouvet, Wuest, Oncology Sample Name vb 143  
Data File 10091004.d Instrument Name 6220 oaTOF  
Position -1 Operator ami  
Acq Method DA Method da ami low mass.m

### Compound Table

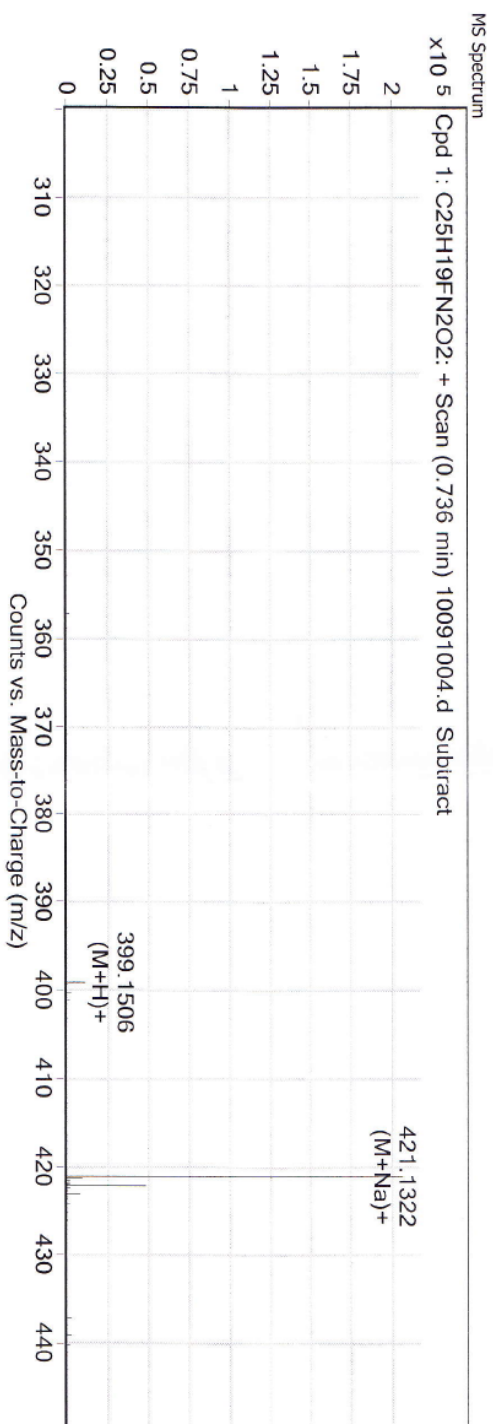

| m/z      | Calc m/z | Diff(ppm) | z | Abund  | Formula            | Ion     |
|----------|----------|-----------|---|--------|--------------------|---------|
| 399.1506 | 399.1503 | 0.64      | 1 | 11273  | C25 H20 F N2 O2    | (M+H)+  |
| 421.1322 | 421.1323 | -0.17     |   | 207434 | C25 H19 F N2 Na O2 | (M+Na)+ |

--- End Of Report ---

**HPLC trace (254 nm) - 5,6-Dihydro-11,12-didehydrodibenzo-[b,f]azocino-3-oxoprop-yl-4-fluorobenzamide (FB-DBCO).**

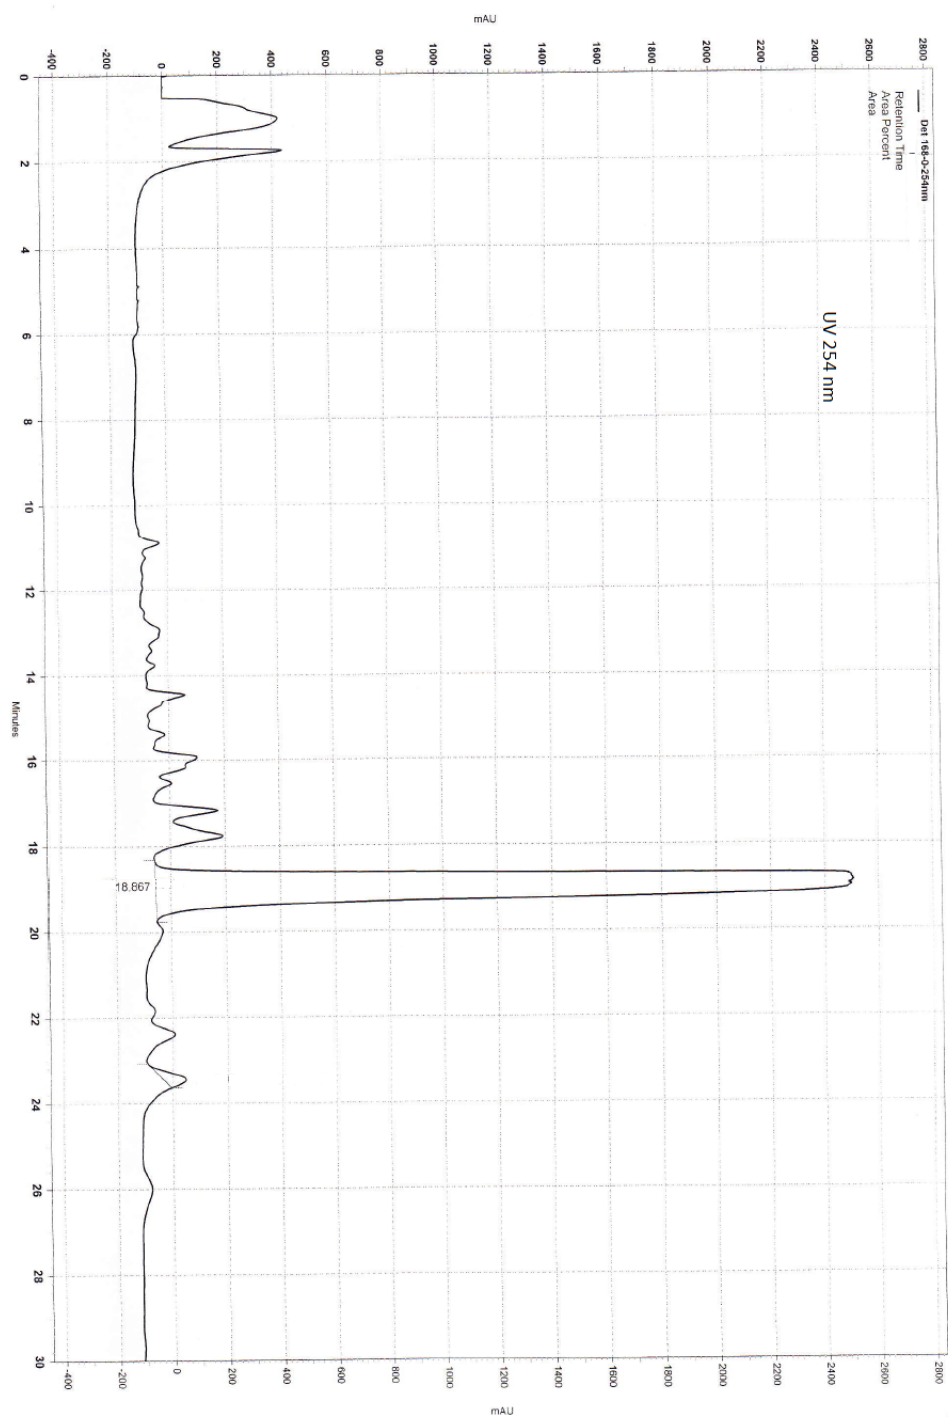

**<sup>1</sup>H-NMR - 17-[11-Azido-3,6,9-trioxaundane-1-amino]-17-desmethoxy geldanamycin (6)**

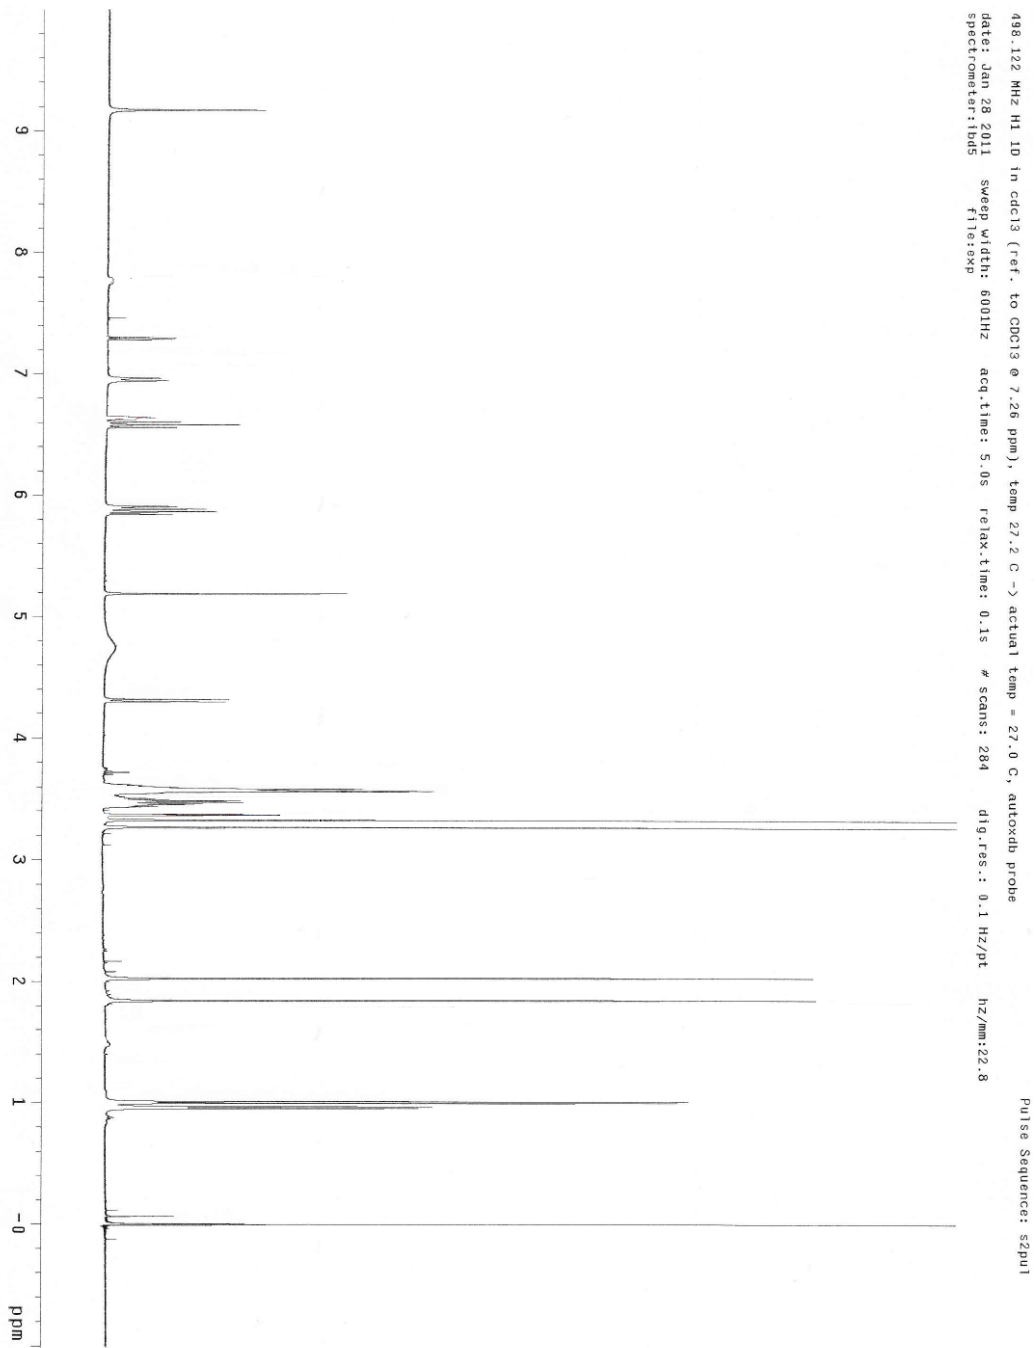

### MS - 17-[11-Azido-3,6,9-trioxaundane-1-amino]-17-desmethoxy geldanamycin (6)

## Qualitative Compound Report

|            |                            |                 |                   |
|------------|----------------------------|-----------------|-------------------|
| Comment    | V. Bouvet, Wuest, Oncology | Sample Name     | Wb_193            |
| Data File  | 11012109.D                 | Instrument Name | 6220 03TOF        |
| Position   | -1                         | Operator        | amh               |
| Acq Method |                            | DA Method       | da_ami_low_mass.m |

#### Compound Table

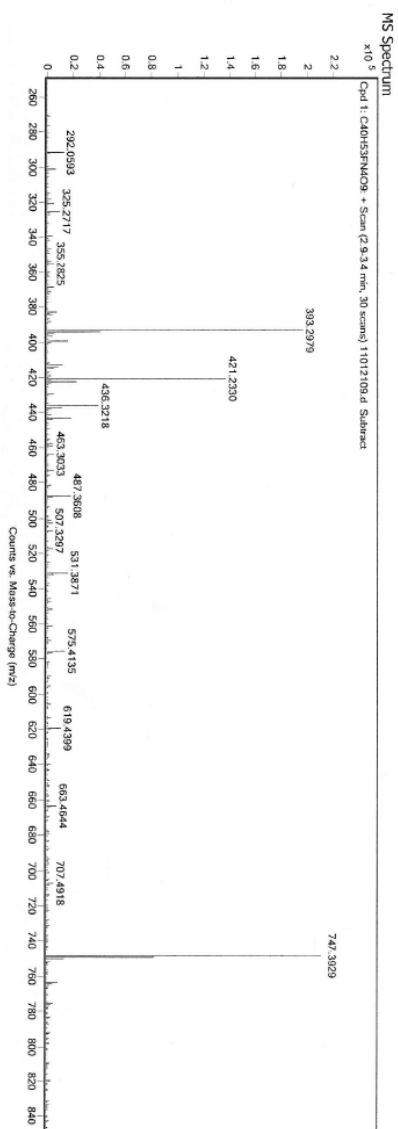

--- End Of Report ---

HPLC trace (254 nm) - 17-[11-Azido-3,6,9-trioxaudane-1-amino]-17-desmethoxy geldanamycin (6)

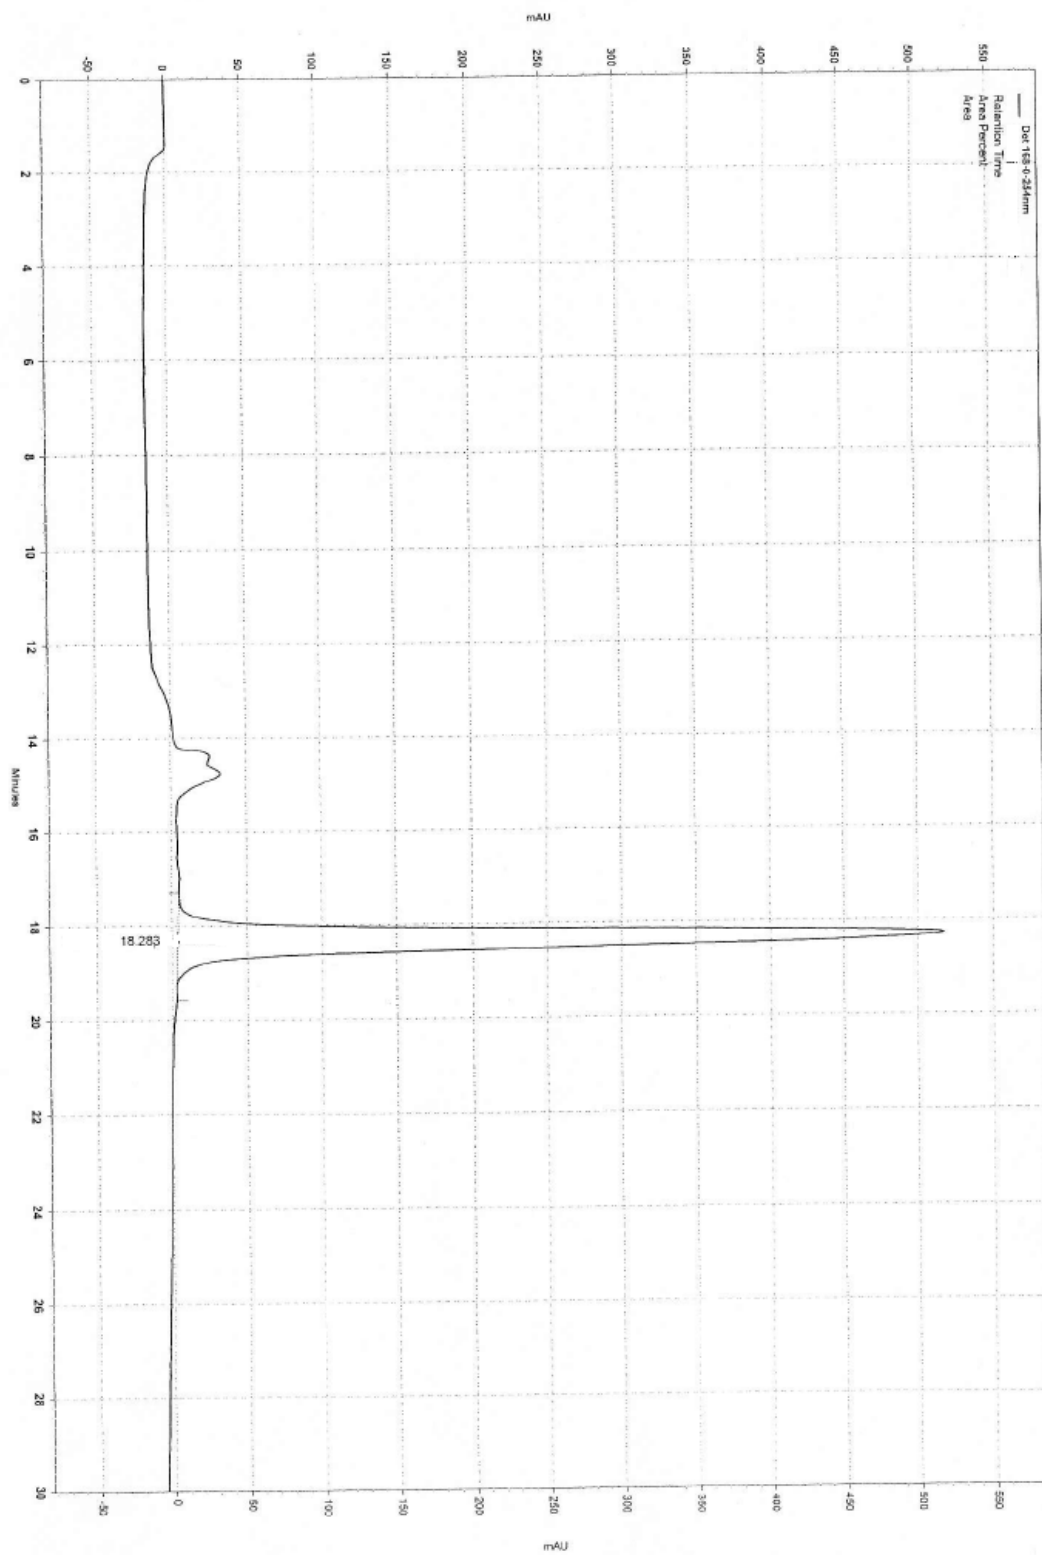



## MS regioisomer 1 – 6-FB-DBCO-coupled triazole (7)

### Qualitative Compound Report

Comment V. Bouvet, Wuest, Oncology Sample Name vb 145a  
Data File 10091002.d Instrument Name 6220 oaTOF  
Position -1 Operator ami  
Acq Method DA Method da anni low mass.m

#### Compound Table

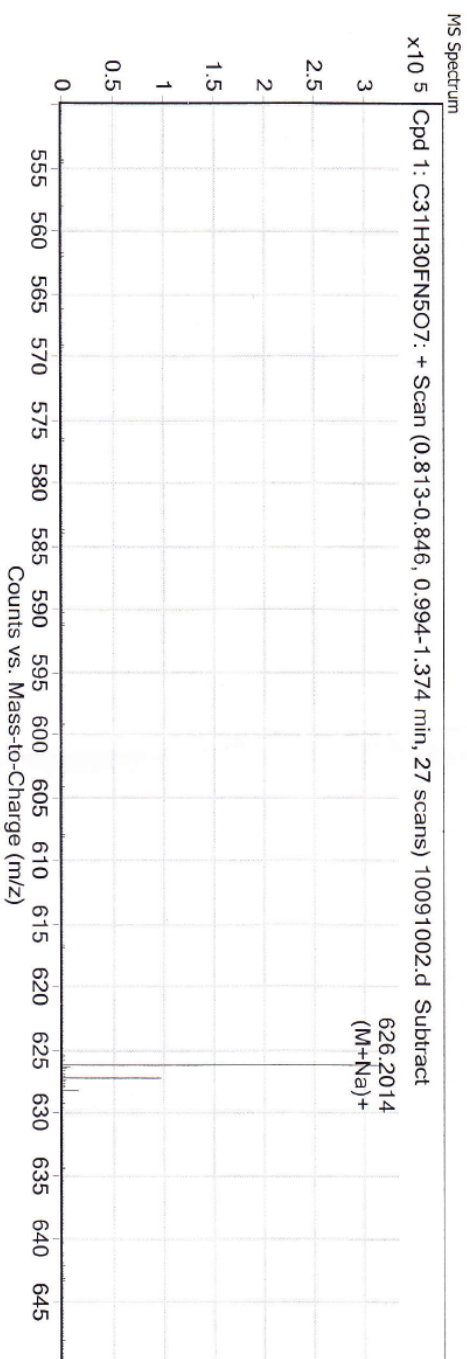

#### MS Spectrum Peak List

| m/z      | Calc m/z | Diff (ppm) | Abund  | Formula            | Ion     |
|----------|----------|------------|--------|--------------------|---------|
| 626.2014 | 626.2021 | -1.16      | 316653 | C31 H30 F N5 Na O7 | (M+Na)+ |

--- End Of Report ---

## MS regioisomer 2 – 6-FB-DBCO-coupled triazole (7)

### Qualitative Compound Report

Comment V. Bouvet, Wuest, Oncology Sample Name vb 145b  
Data File 10091003.d Instrument Name 6220 oaTOF  
Position -1 Operator ami  
Acq Method DA Method da anil low mass.m

#### Compound Table

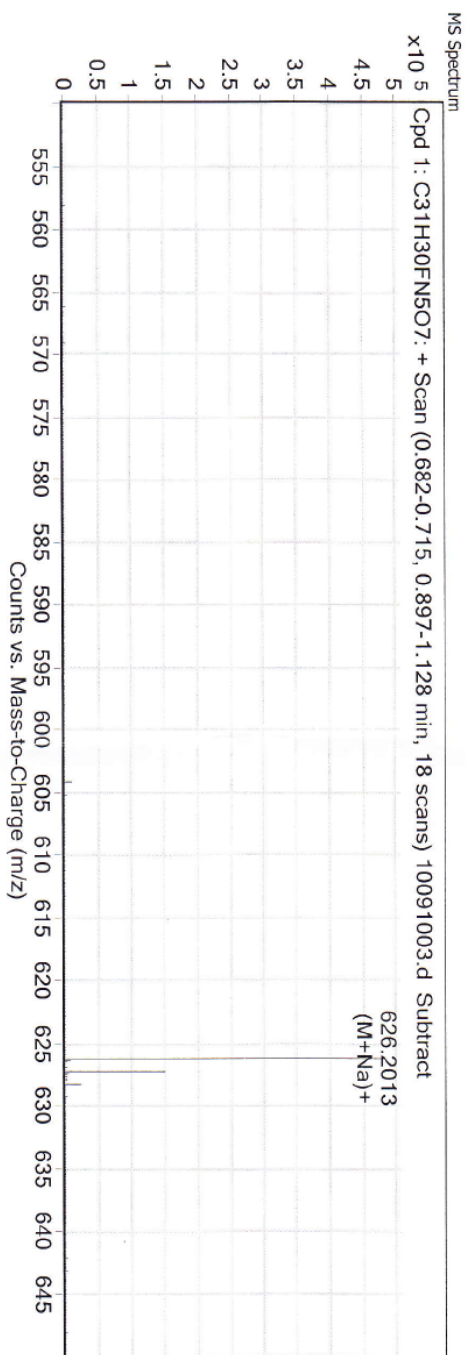

#### MS Spectrum Peak List

| m/z      | Calc m/z | Diff(ppm) | Abund  | Formula            | Ion     |
|----------|----------|-----------|--------|--------------------|---------|
| 626.2013 | 626.2021 | -1.4      | 482245 | C31 H30 F N5 Na O7 | (M+Na)+ |

--- End Of Report ---

### HPLC trace (254 nm) – 6-FB-DBCO-coupled triazole (7)

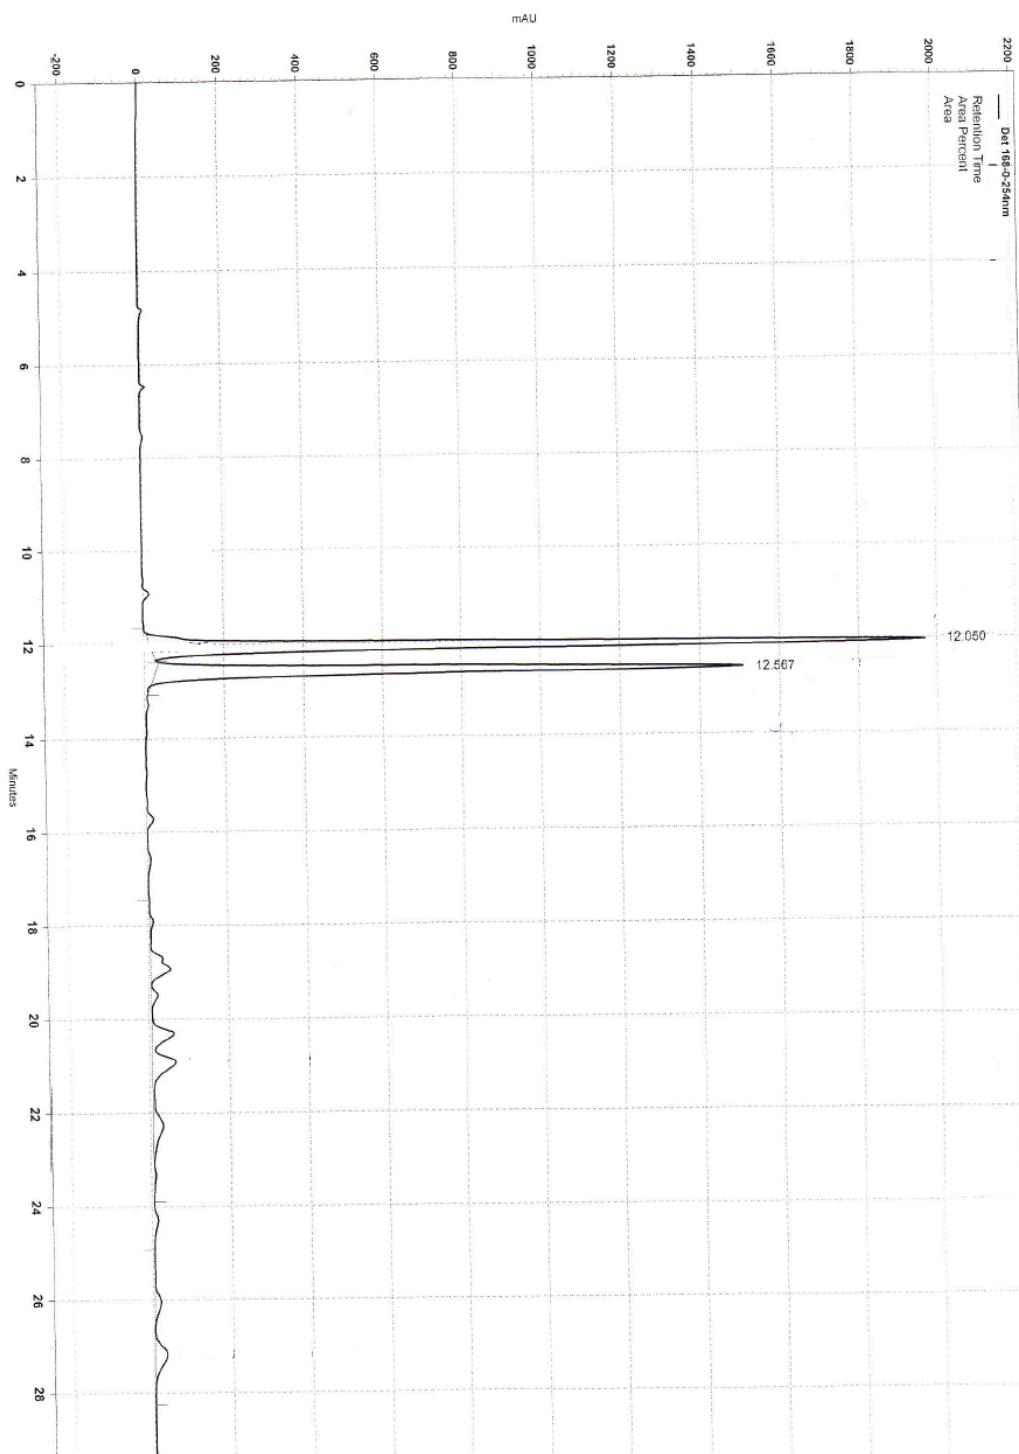

### MS - FB-DBCO-coupled triazole (8)

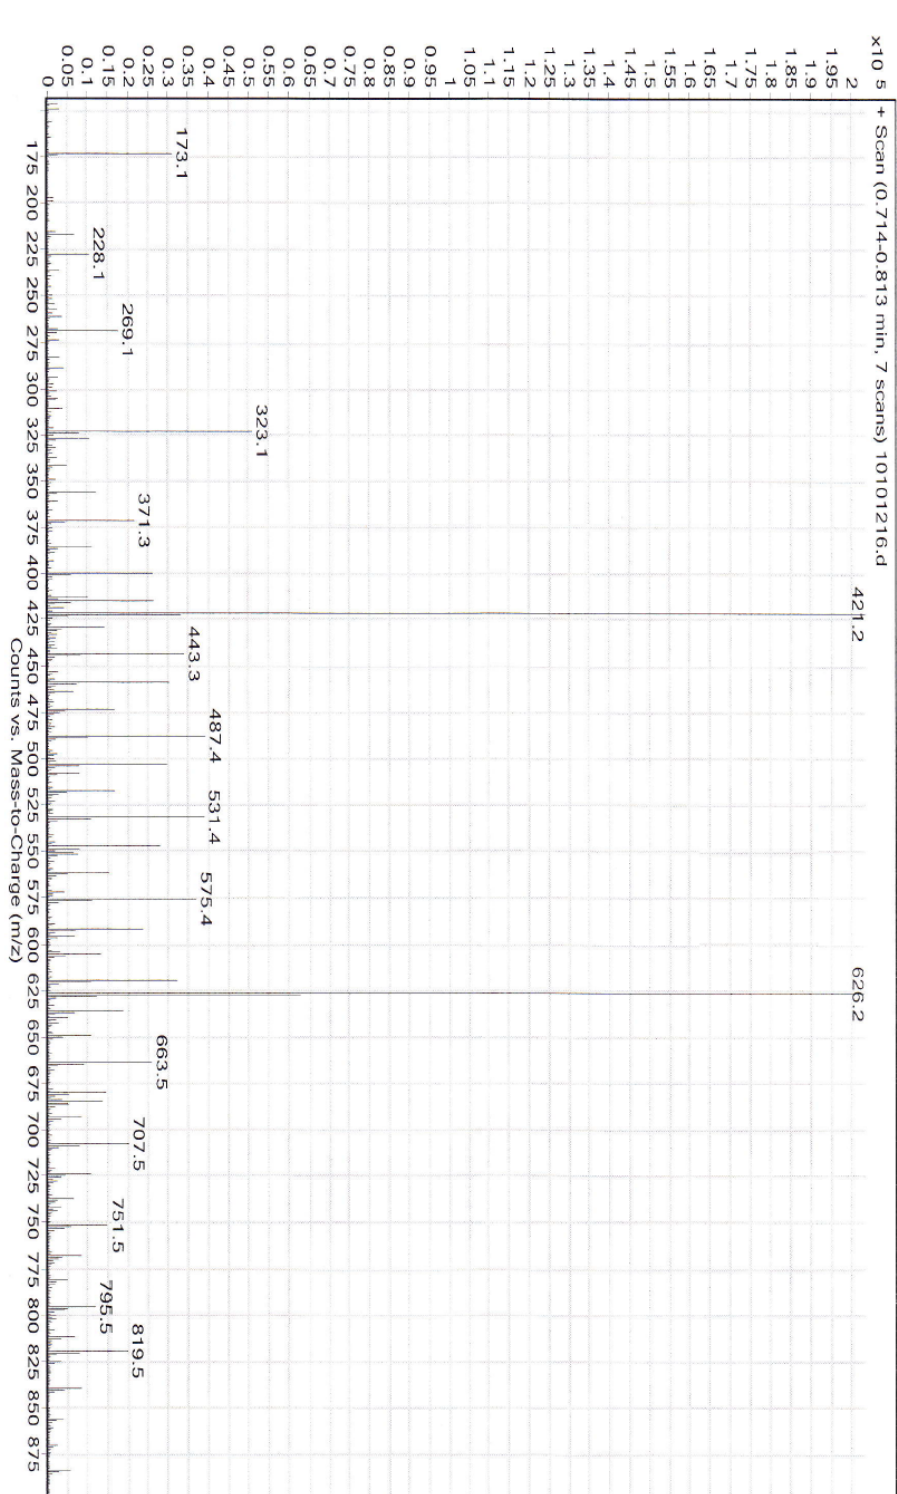

| Sample Name   | vb 147-1   | Position    | -1 | Instrument Name | 6220 oaTOF                    | User Name              | anti                  |
|---------------|------------|-------------|----|-----------------|-------------------------------|------------------------|-----------------------|
| Inj Vol       | 5          | InjPosition |    | SampleType      | Sample                        | IRM Calibration Status | Success               |
| Data Filename | 10101216.d | ACQ Method  |    | Comment         | V. Bouvet, Wuest,<br>Oncology | Acquired Time          | 10/12/2010 7:16:15 PM |

### HPLC trace (254 nm) - FB-DBCO-coupled triazole (8)

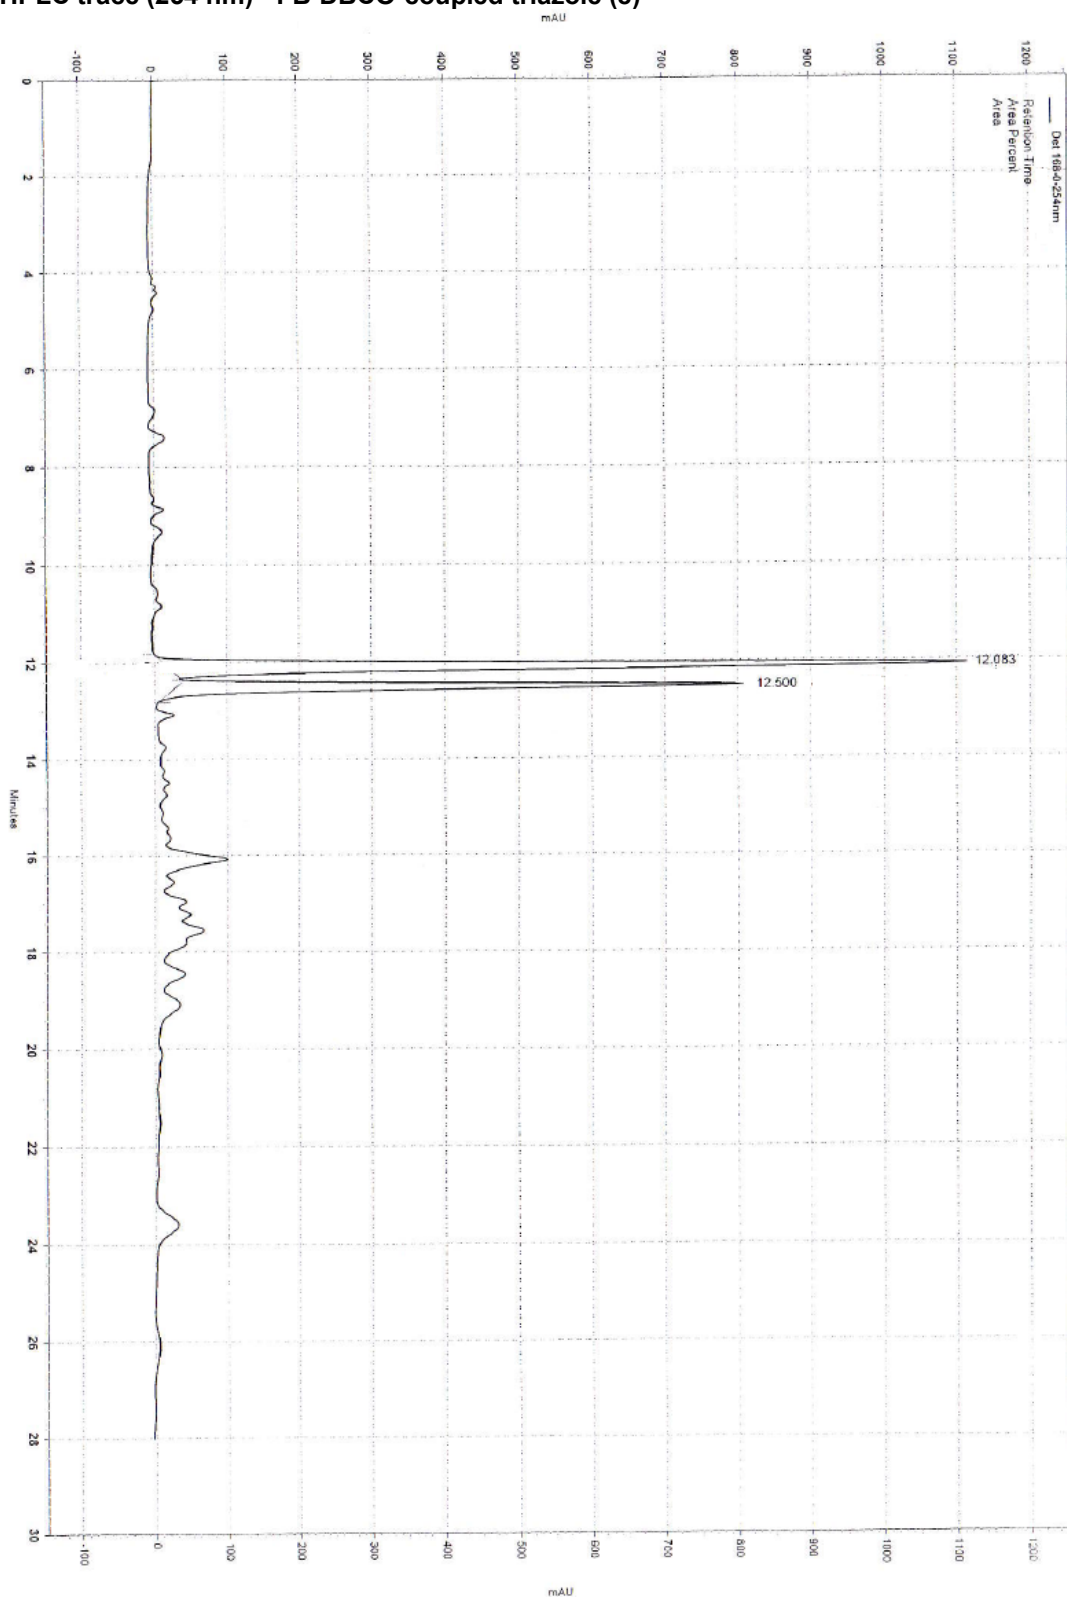

### MS - FB-DBCO-coupled triazole (9)

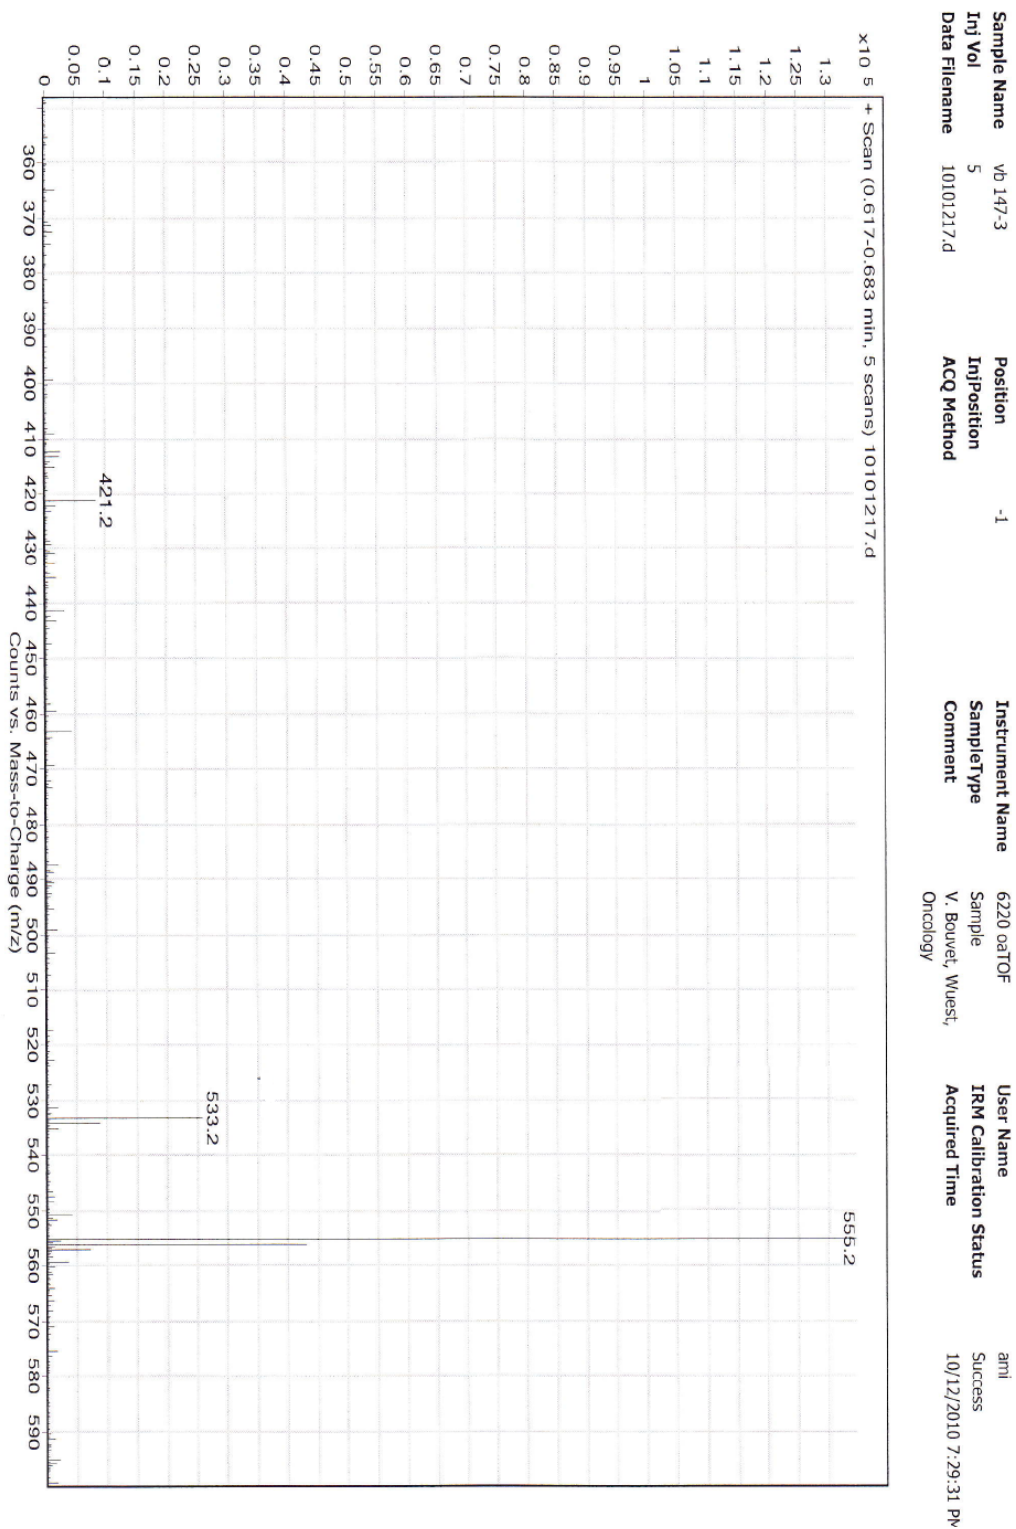

### HPLC trace (254 nm) - FB-DBCO-coupled triazole (9)

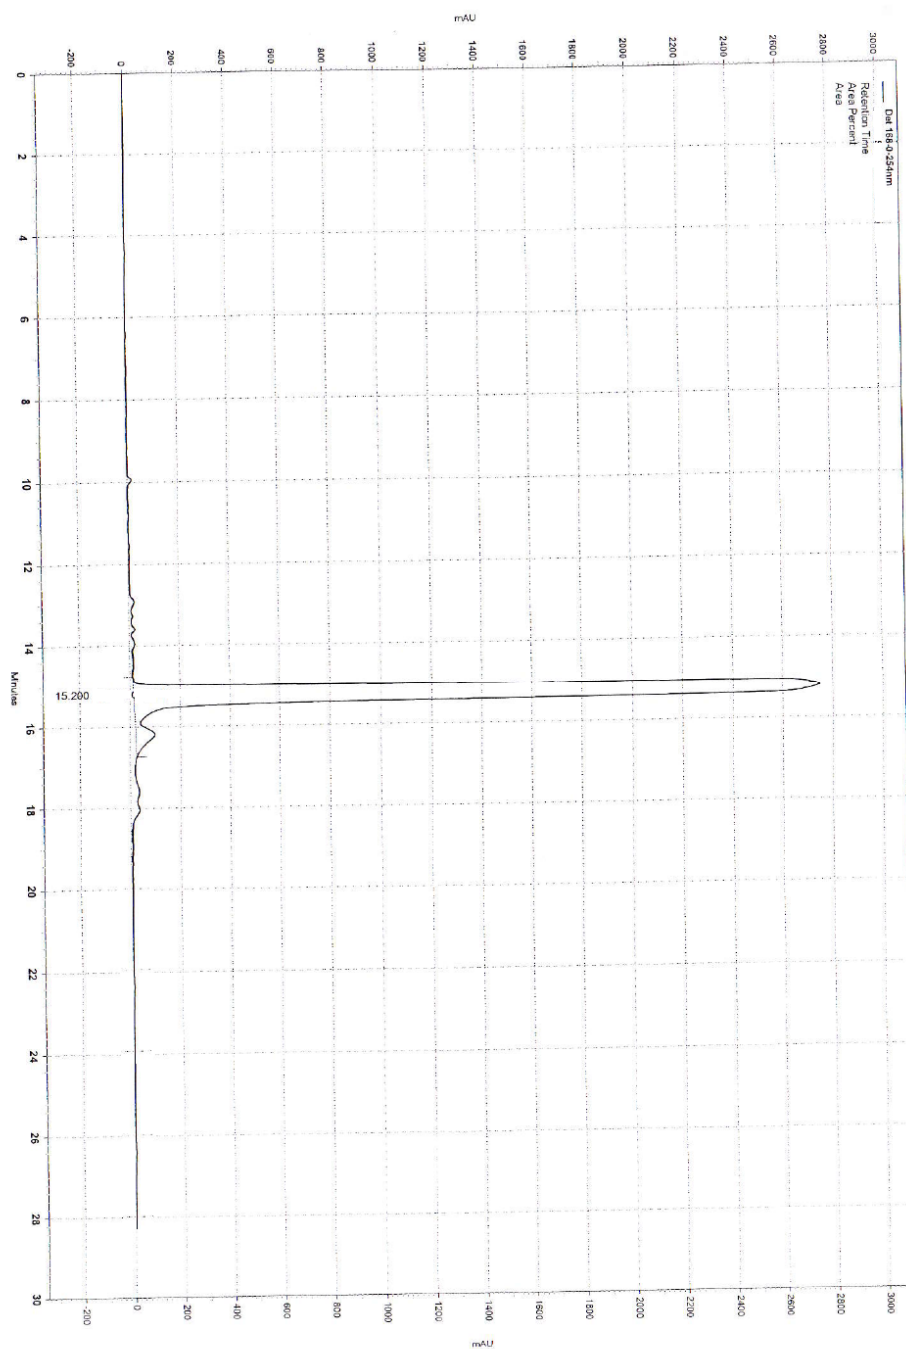

### MS - FB-DBCO-coupled triazole (10)

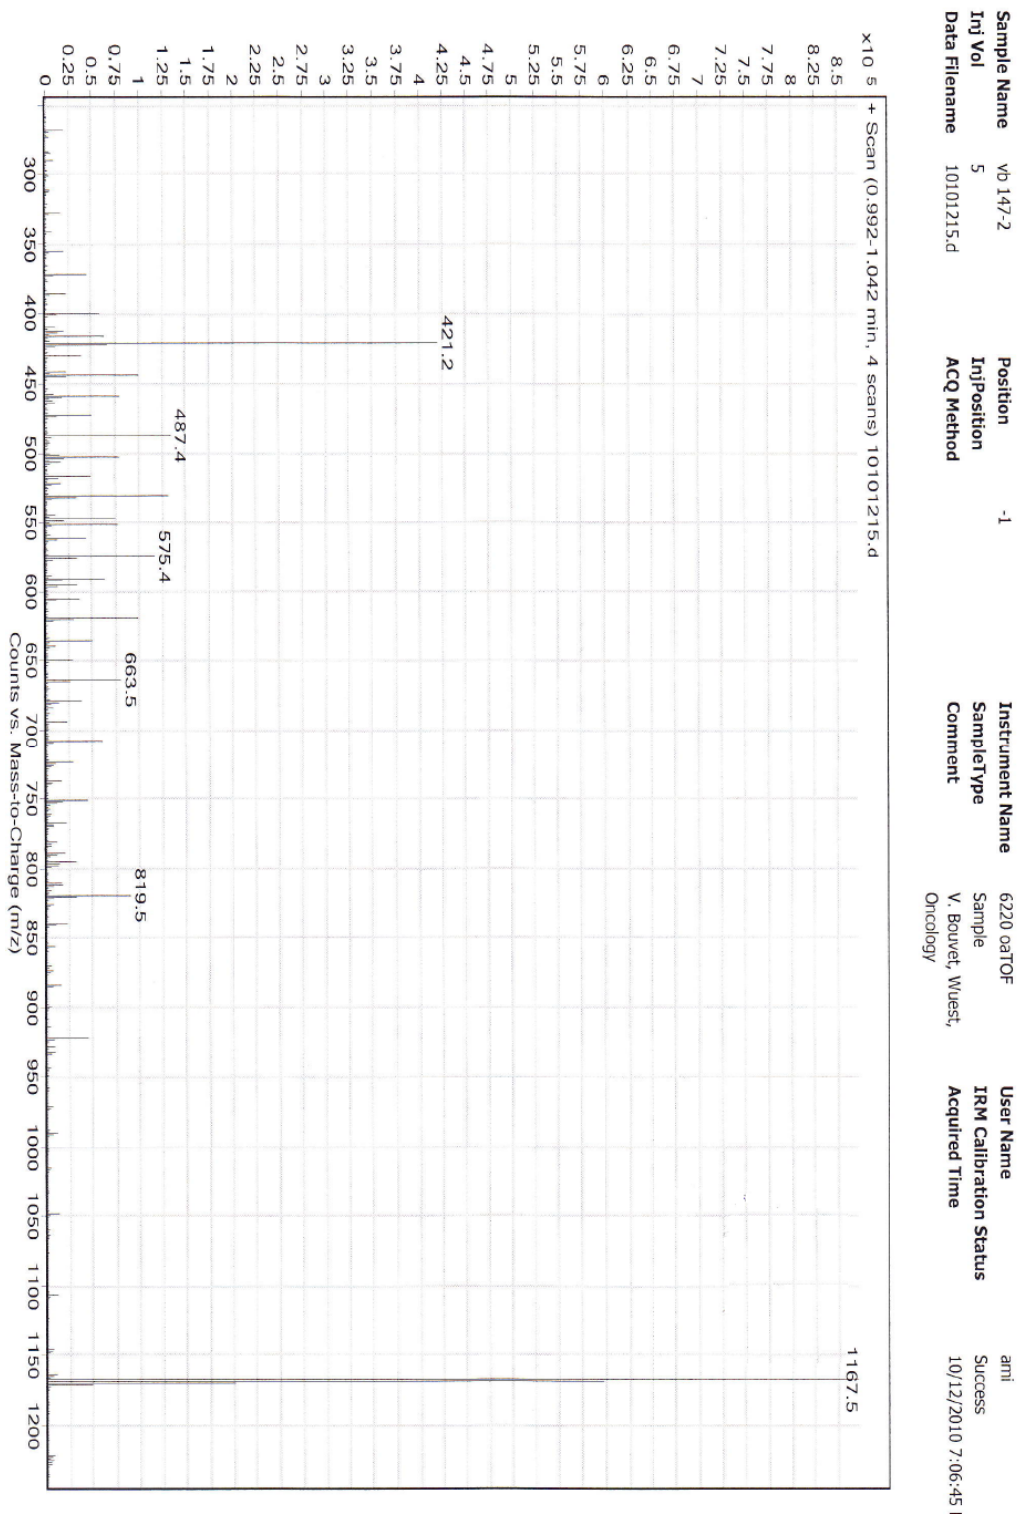



### HPLC trace (254 nm) - FB-DBCO-coupled triazole (10)

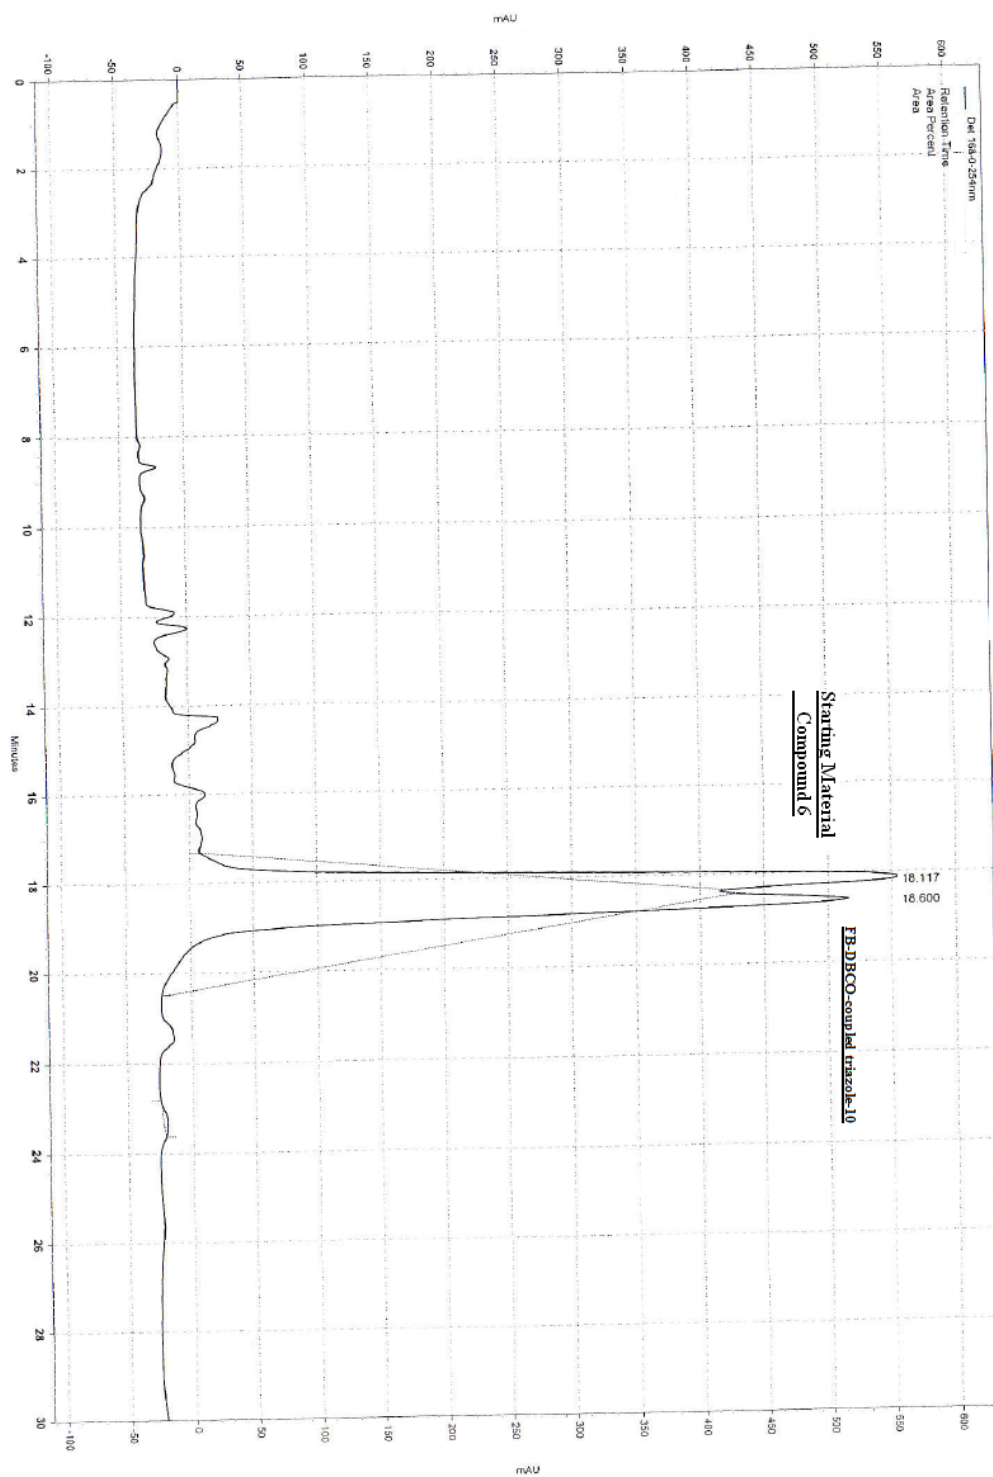

### MS -FB-DBCO-coupled triazole (11)

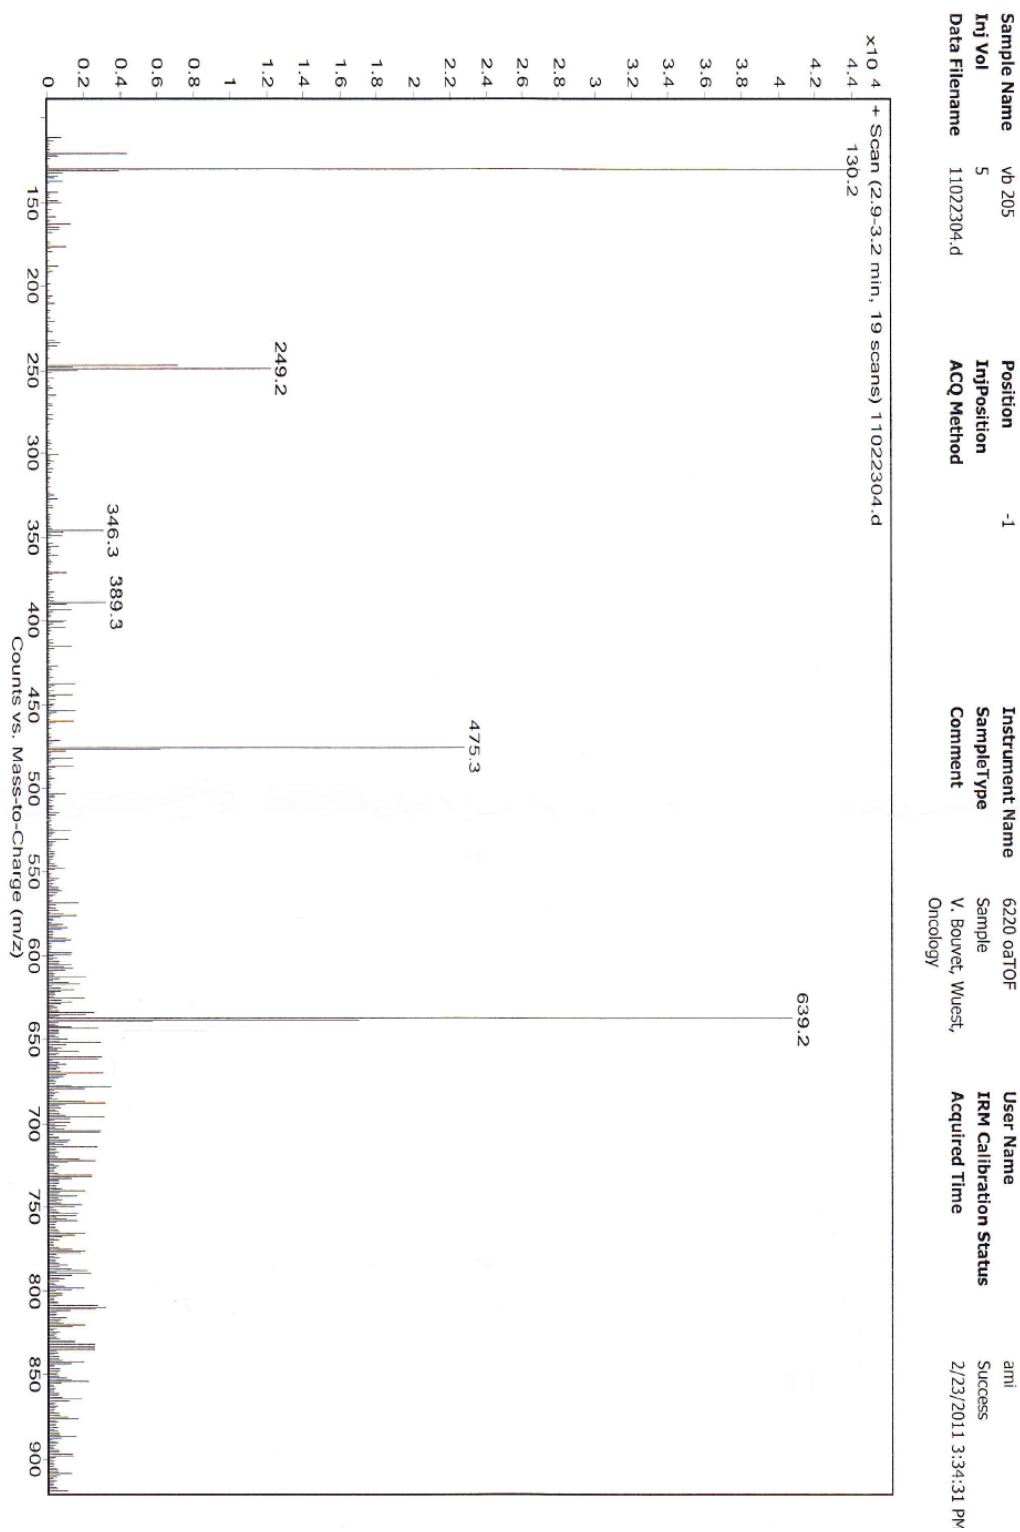

### HPLC trace (254 nm) -FB-DBCO-coupled triazole (11)

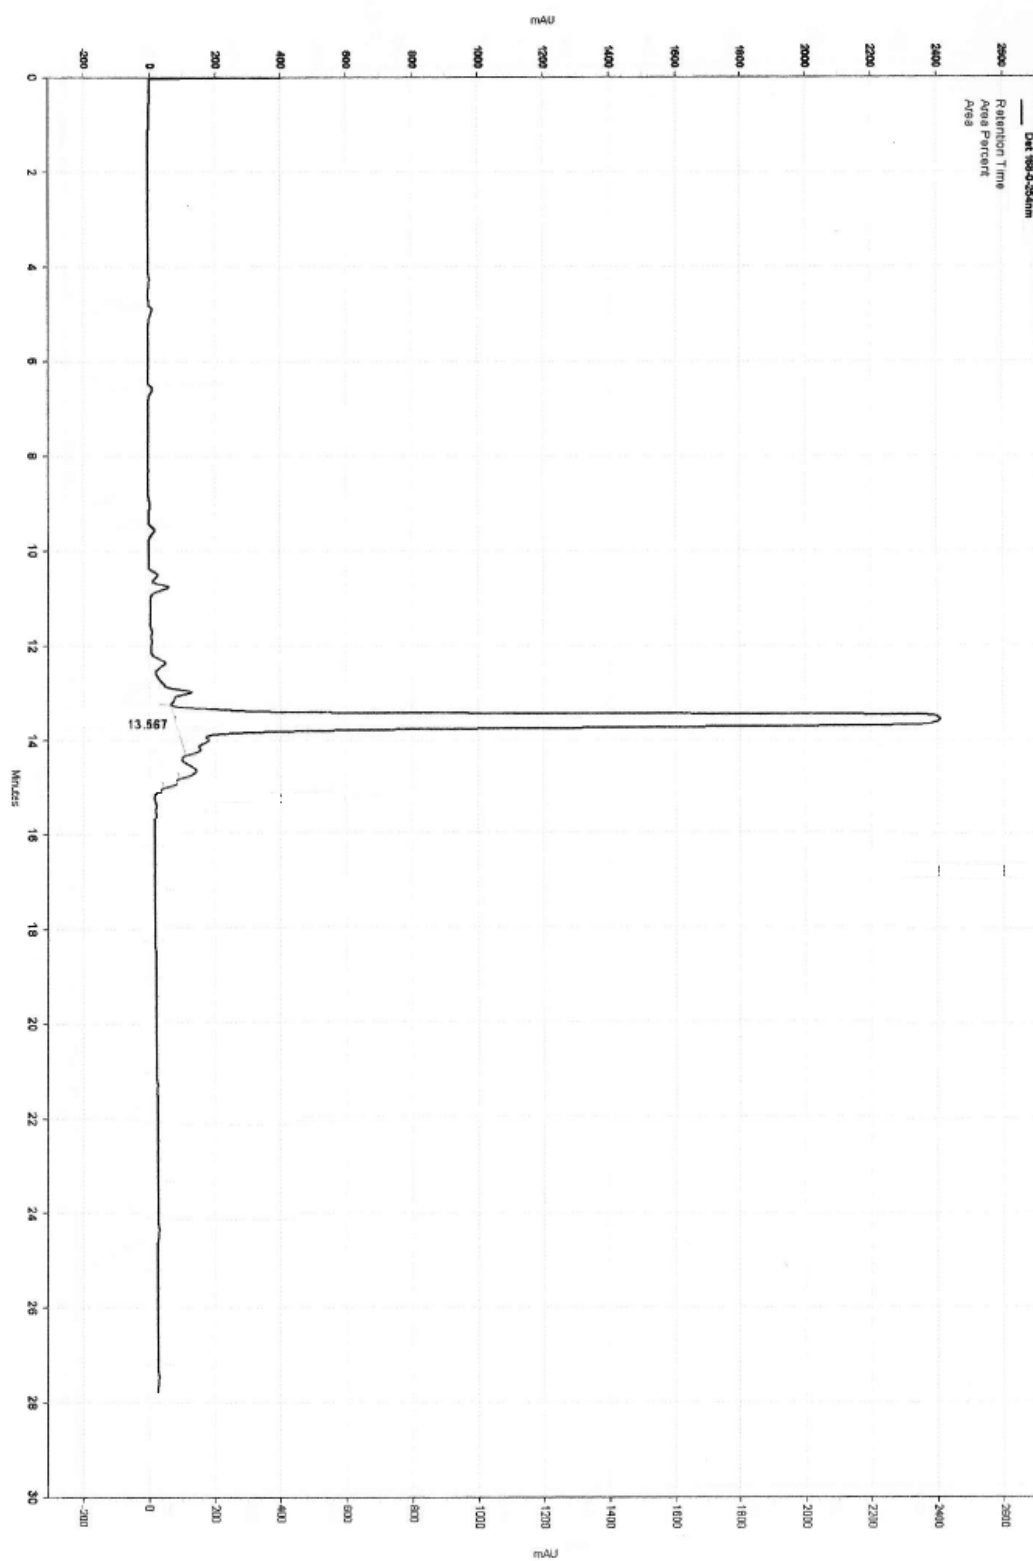

### Radio-HPLC trace [<sup>18</sup>F]FB-DBCO

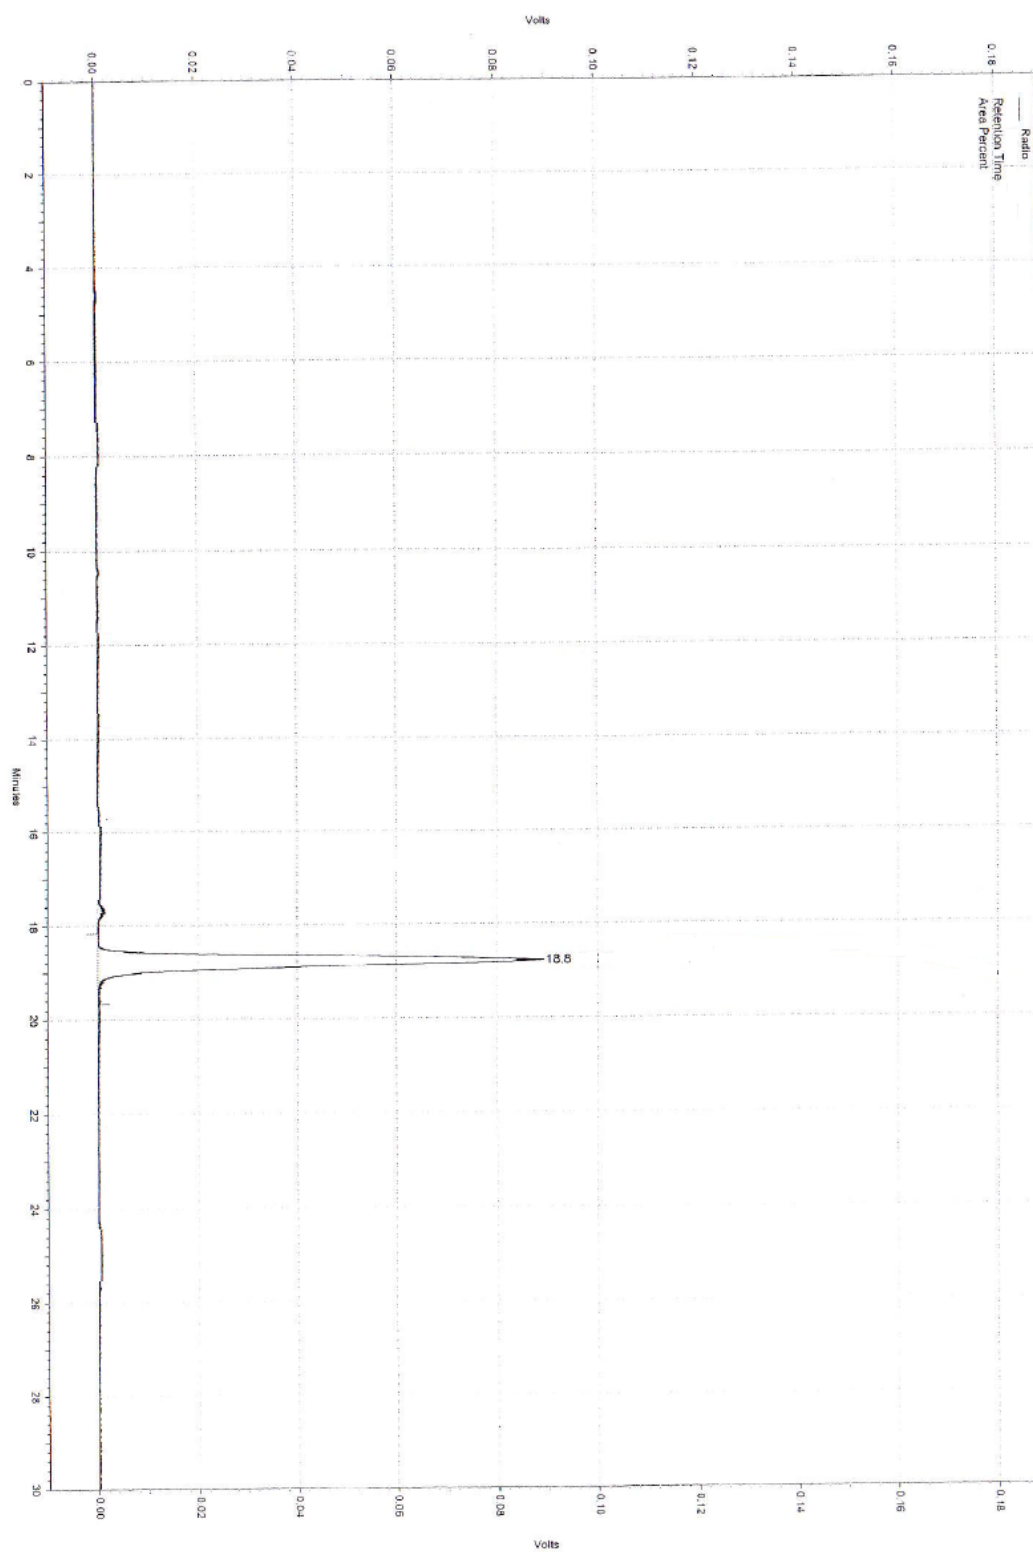

Radio-HPLC trace of [ $^{18}\text{F}$ ]FB-DBCO (with co-injection of reference compounds FB-DBCO)

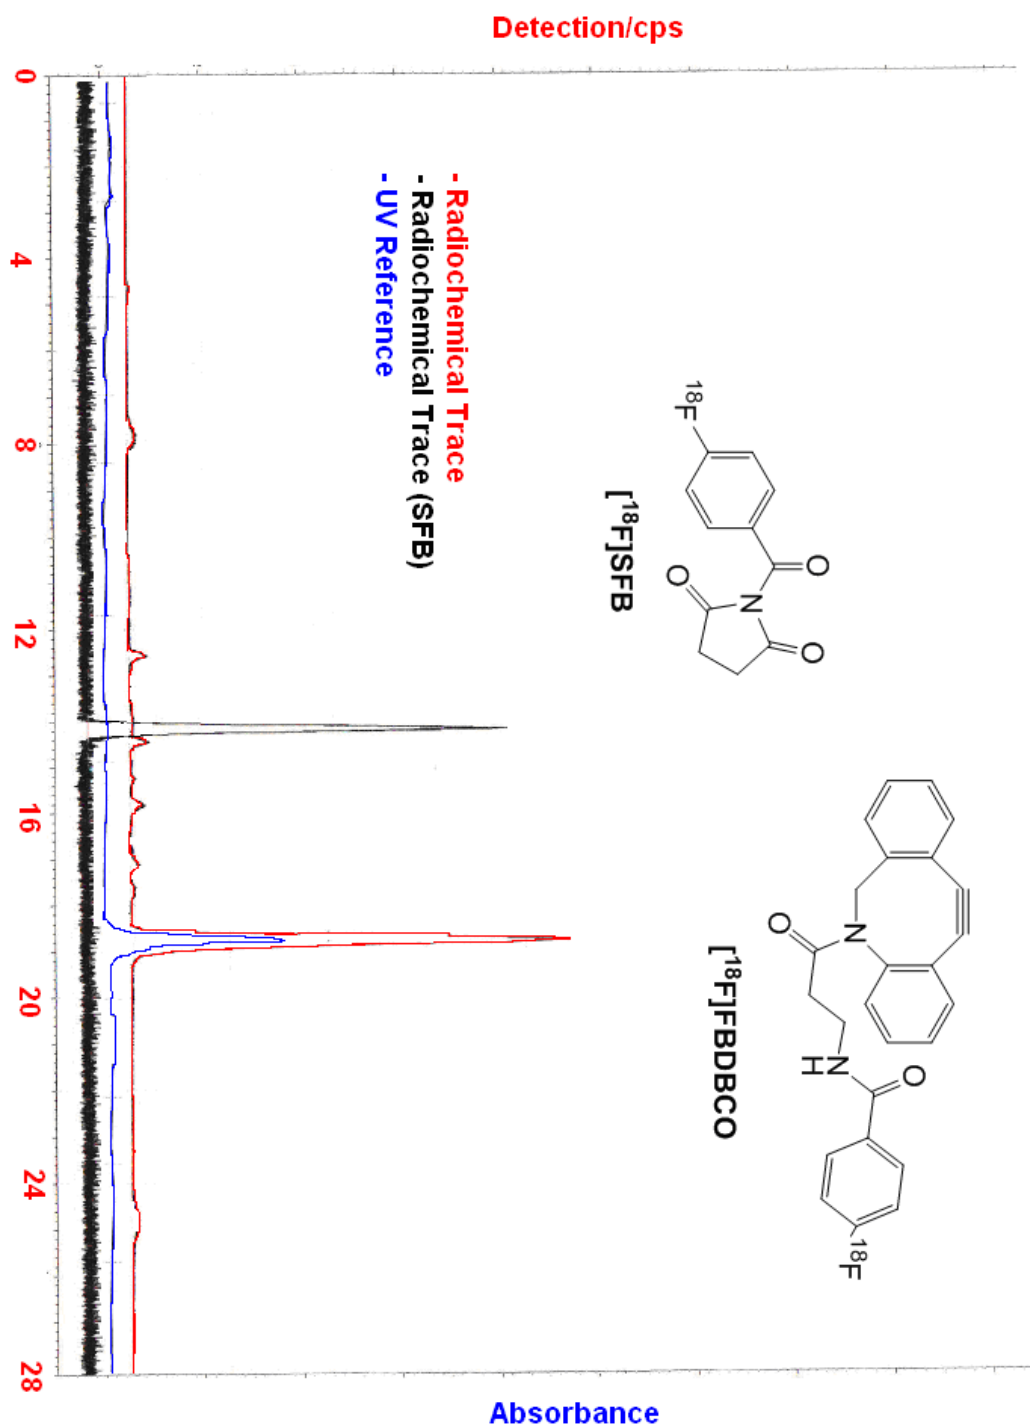

### Radio-HPLC trace of [<sup>18</sup>F]FB-DBCO-coupled triazole ([<sup>18</sup>F]7)

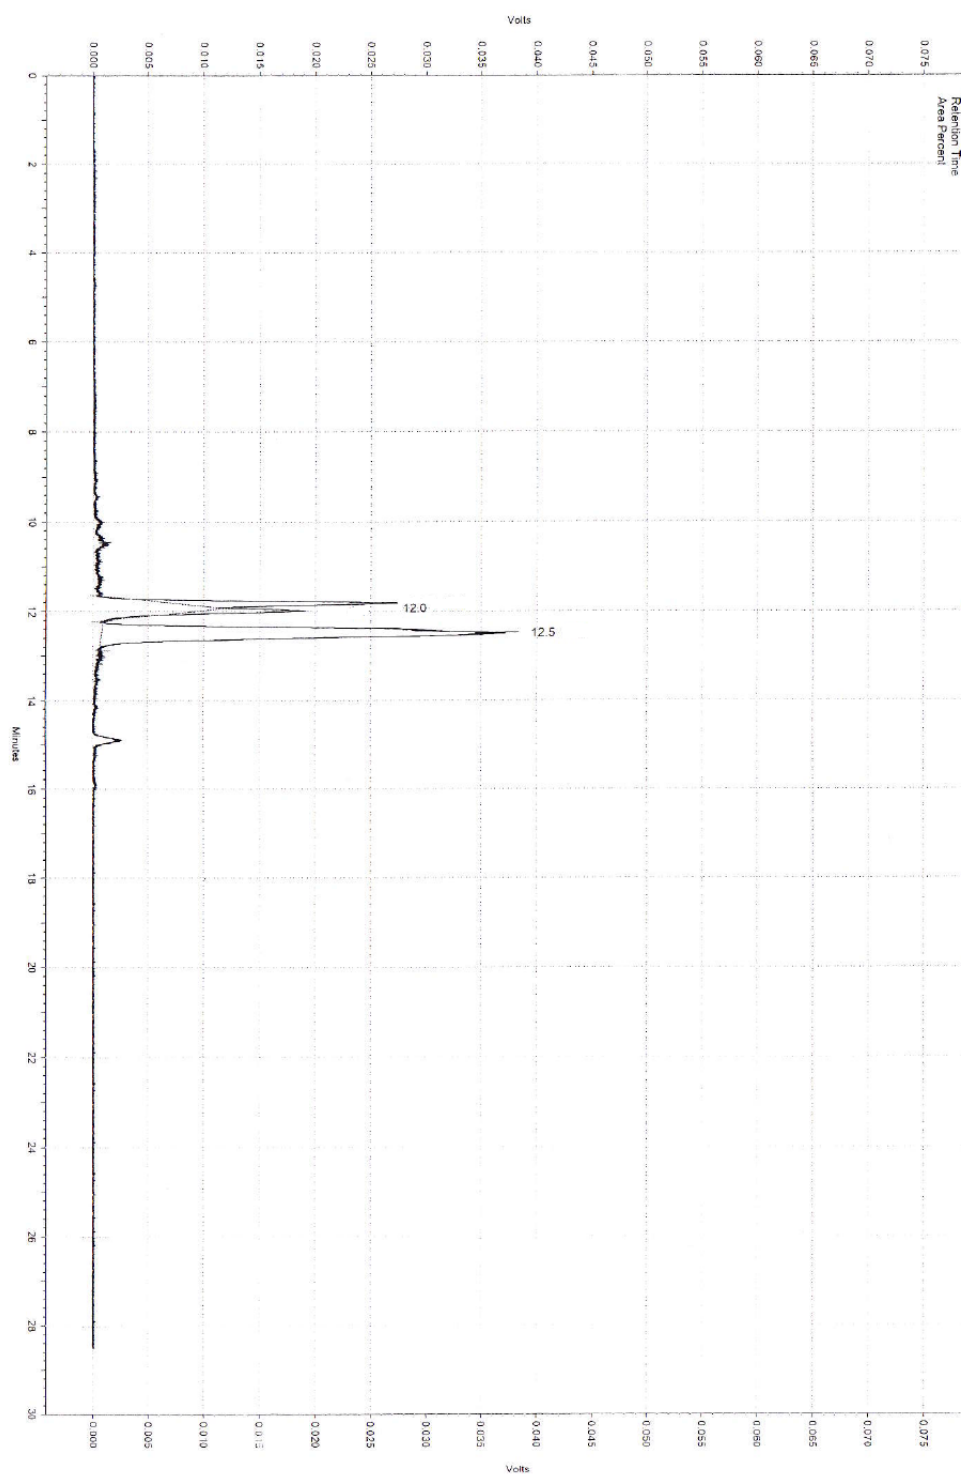

### Radio-HPLC trace of [ $^{18}\text{F}$ ]FB-DBCO-coupled triazole ([ $^{18}\text{F}$ ]8)

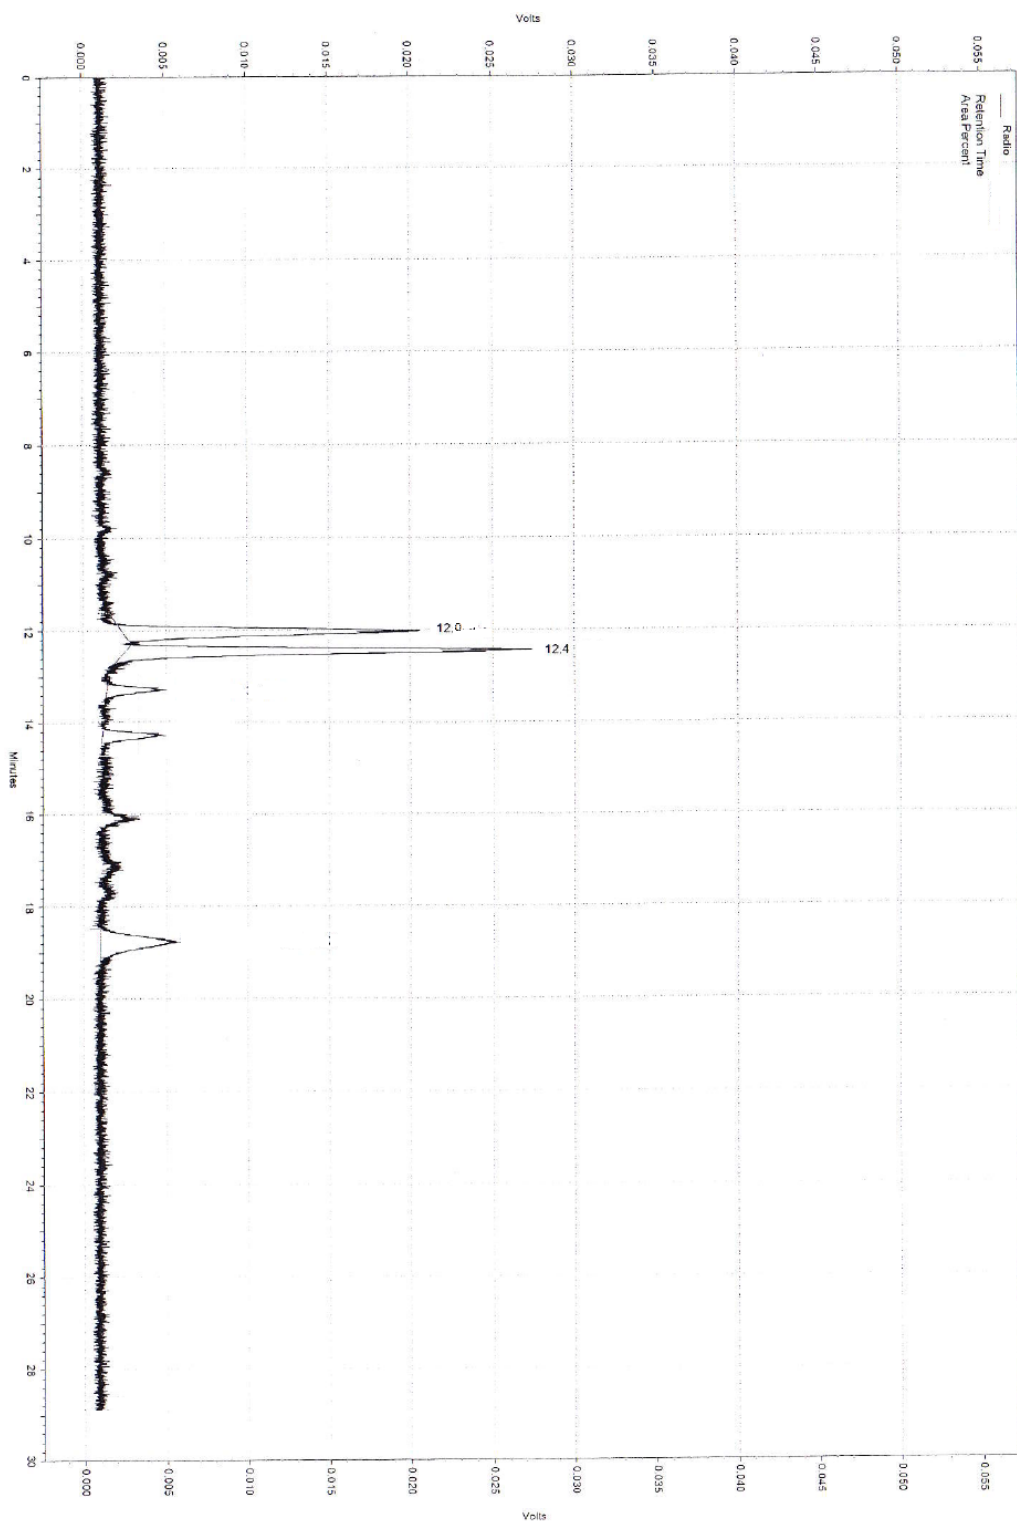

### Radio-HPLC trace of [ $^{18}\text{F}$ ]FB-DBCO-coupled triazole ( $[^{18}\text{F}]\mathbf{9}$ )

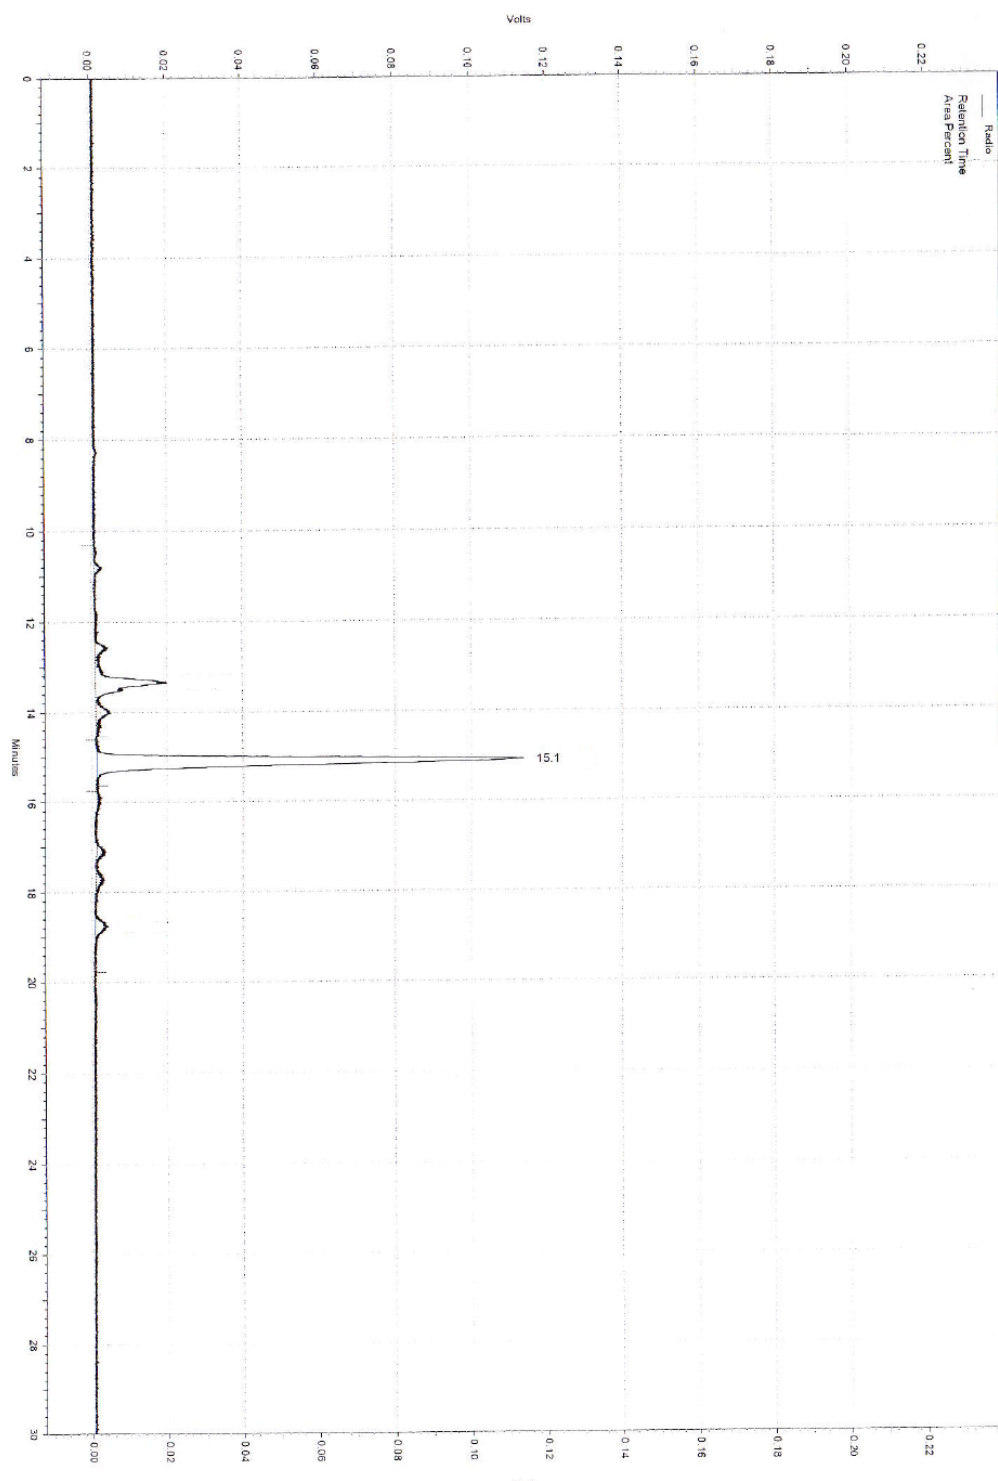



### Radio-HPLC trace of [ $^{18}\text{F}$ ]FB-DBCO-coupled triazole ([ $^{18}\text{F}$ ]10)

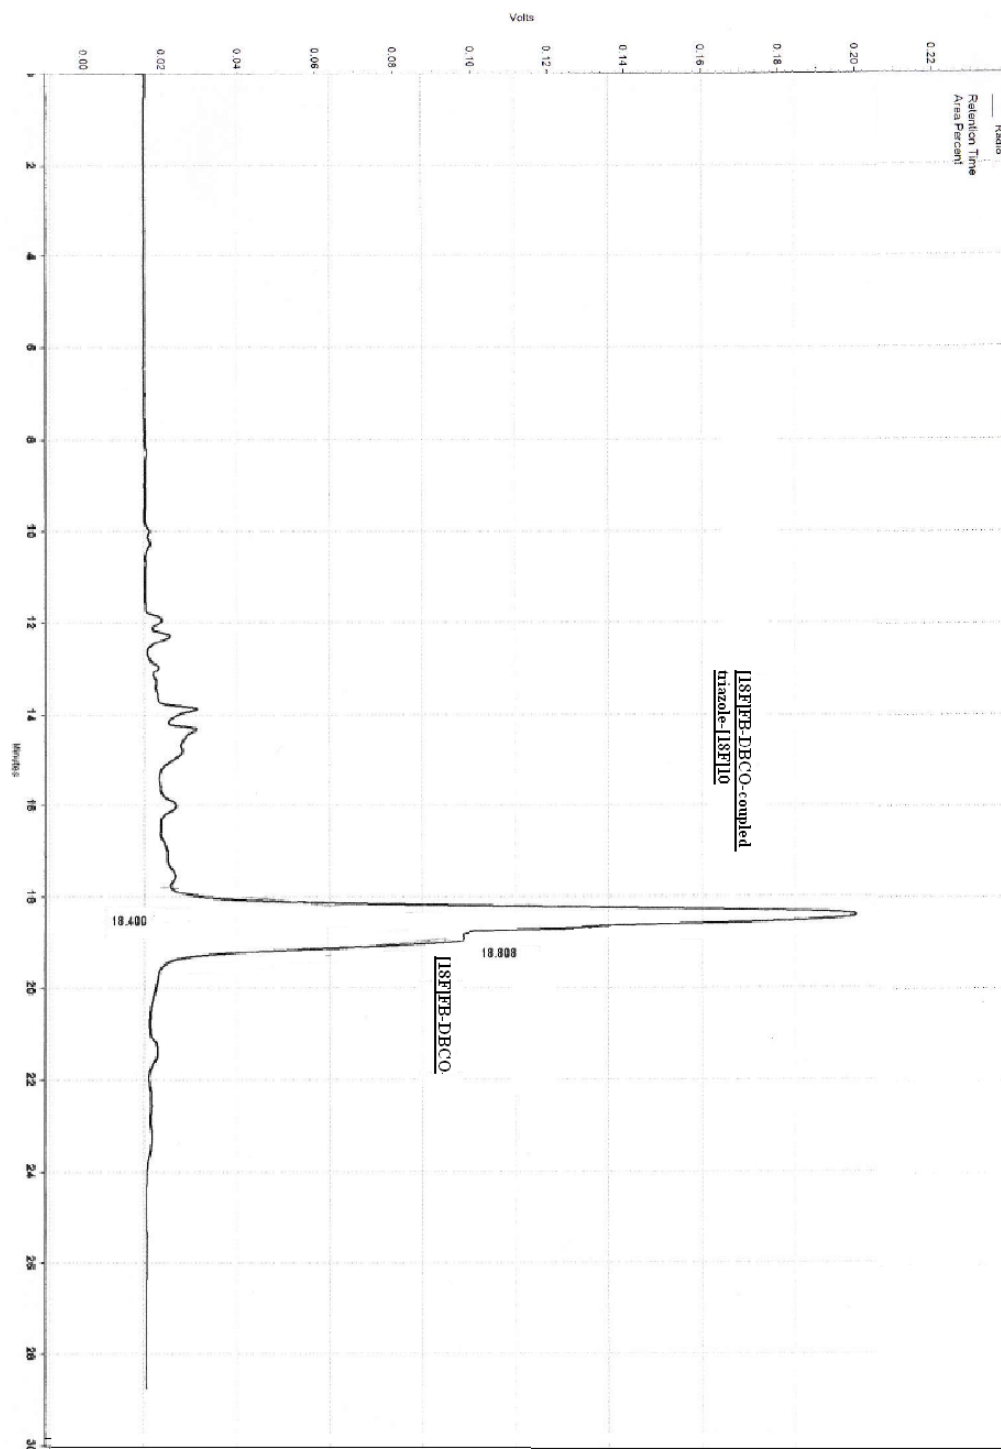

### Radio-HPLC trace of [ $^{18}\text{F}$ ]FB-DBCO-coupled triazole ([ $^{18}\text{F}$ ]11)

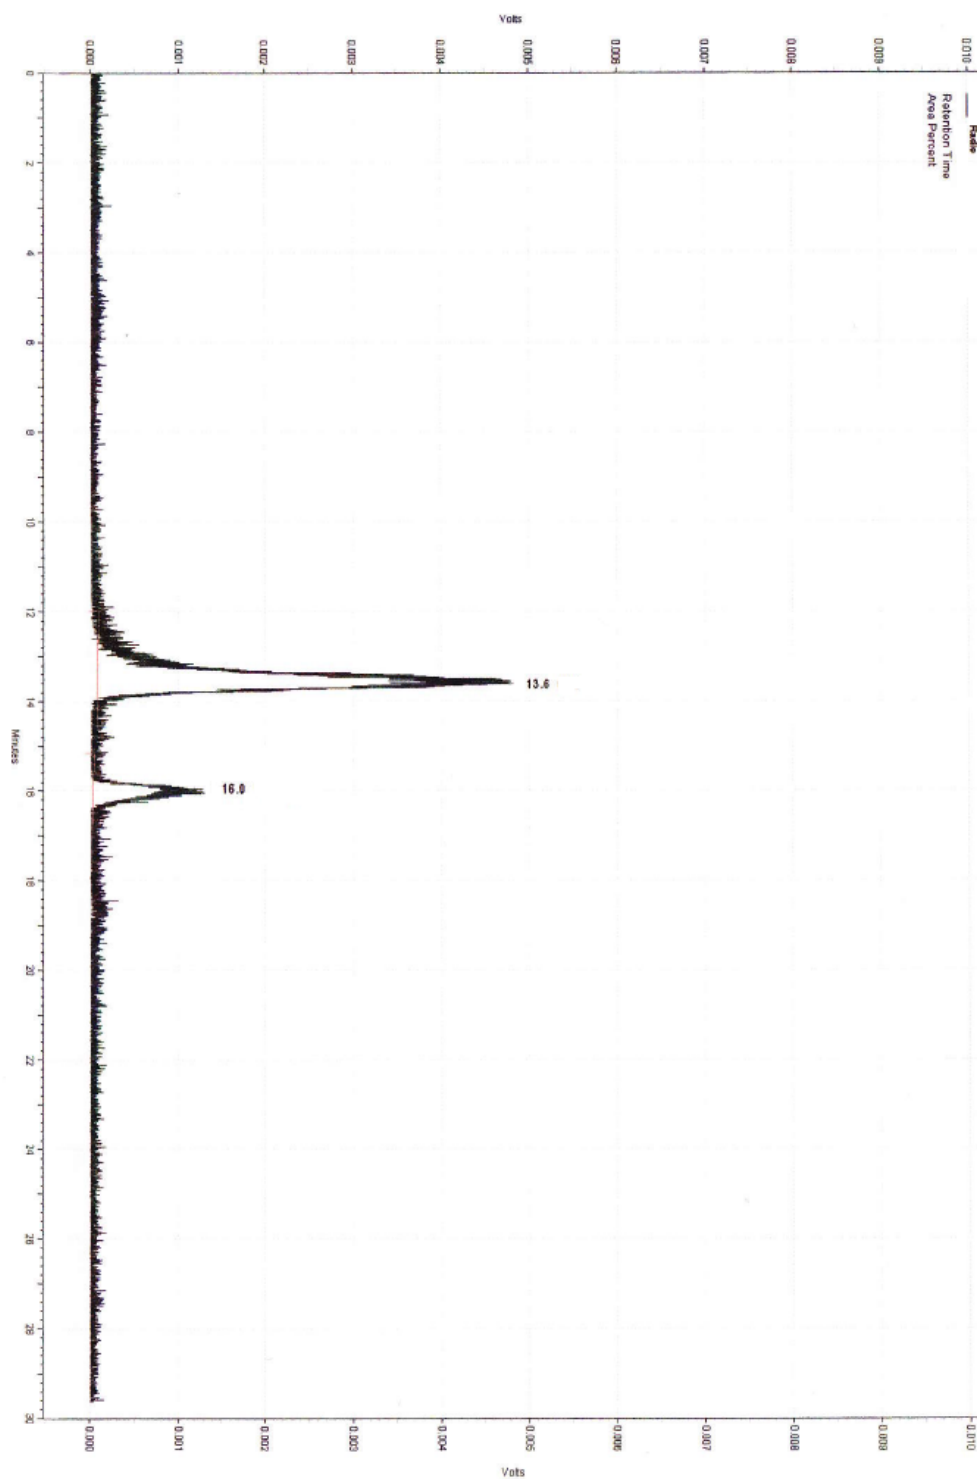

Supplement: c1ob06034a.pdf [file c1ob06034a.pdf]
